# Supplementary material for: Temperature-regulated aggregation-induced emissive self-healable hydrogels for controlled drug delivery
Source: Royal Society of Chemistry journal article supplement (doi:10.1039/c8py01064a), 2018-01-01
Supplement: c8py01064a1.pdf [file c8py01064a1.pdf]

## Electronic Supplementary Information (ESI)

### Temperature-Regulated Aggregation-Induced Emissive Self-Healable Hydrogel for Controlled Drug Delivery

Xuemeng Wang,<sup>a</sup> Kaiyue Xu,<sup>b</sup> Haicui Yao,<sup>a</sup> Limin Chang,<sup>a</sup> Yong Wang,<sup>b</sup> Wenjuan Li,<sup>b</sup> Youliang Zhao,<sup>c</sup> Jianglei Qin<sup>a, \*</sup>

<sup>a</sup>College of Chemistry and Environmental Science, Hebei University, 180 East Wusi Road, Baoding 071002, China.

<sup>b</sup>Medical College, Hebei University, Baoding 071002, China.

<sup>c</sup>College of Chemistry, Chemical Engineering and Materials Science, Soochow University, Suzhou 215123, China.

E-mail: [qinhbu@iccas.ac.cn](mailto:qinhbu@iccas.ac.cn)

## Contents

**S1.** Synthesis of TPE-2OH.

**S2.** Synthesis of TPE diethanol.

**S3.** Synthesis of TPE-2DDMAT.

**Scheme S1.** Synthesis procedure of TPE-2DDMAT.

**Fig. S1** FT-IR spectrum of TPE-[P(DMA<sub>94</sub>-*stat*-DAA<sub>30</sub>)]<sub>2</sub>.

**Fig. S2** DSC curves of the TPE-[P(DMA-*stat*-DAA)]<sub>2</sub>.

**Fig. S3** UV spectra of TPE-2DDMAT and TPE-[P(DMA-*stat*-DAA)]<sub>2</sub> copolymers.

**Fig. S.** Fluorescence spectra of polymer TPE-[P(DMA<sub>187</sub>-*stat*-DAA<sub>60</sub>)]<sub>2</sub> (a) and TPE-[P(DMA<sub>98</sub>-*stat*-DAA<sub>20</sub>)]<sub>2</sub> (b) at various concentration.

**Fig. S5** PL intensity of 1% TPE-[P(DMA<sub>94</sub>-*stat*-DAA<sub>30</sub>)]<sub>2</sub> solution with increasing temperatures.

**Fig. S6** Fluorescence spectra of hydrogels prepared from TPE-[P(DMA<sub>94</sub>-*stat*-DAA<sub>30</sub>)]<sub>2</sub> with low ratio of DTDPH cross-linking (the insert is optical image of 25% ratio of cross-linking).

**Fig. S7** Comparison of  $G'$  of the hydrogels prepared from different copolymers with POE<sub>23</sub> DH cross-linking.

**Fig. S8** Rheology curve of POE<sub>23</sub> DH cross-linked TPE-[P(DMA<sub>94</sub>-*stat*-DAA<sub>30</sub>)]<sub>2</sub> hydrogel under temperature scan.

**Fig. S9** TPE-[P(DMA<sub>94</sub>-*stat*-DAA<sub>30</sub>)]<sub>2</sub> hydrogel with PEO<sub>23</sub> DH cross-linking was cut into small particles and put into the heart shaped mould with half hydrogel prepared from P(DMA<sub>93</sub>-*stat*-DAA<sub>30</sub>) (a); self-healed hydrogel disk prepared from TPE-[P(DMA<sub>98</sub>-*stat*-DAA<sub>20</sub>)]<sub>2</sub> with P(DMA<sub>93</sub>-*stat*-DAA<sub>30</sub>) hydrogel under room light (b) and 365 nm UV exposure (c).

**Fig. S10** Group ratio triggered gel-sol-gel transition of the hydrogel prepared from TPE- TPE-[P(DMA<sub>94</sub>-*stat*-DAA<sub>30</sub>)]<sub>2</sub> with PEO<sub>23</sub> DH cross-linking.

**Fig. S11** In vitro cytotoxicity of TPE-[P(DMA<sub>98</sub>-*stat*-DAA<sub>20</sub>)]<sub>2</sub> and PEO<sub>23</sub> DH solution with various concentration to HeLa cell (a) and JB6 P+ cells (b).

**Fig. S12** Confocal microscopy images of the JB6 P+ cell in hydrogel prepared from TPE-[P(DMA<sub>94</sub>-*stat*-DAA<sub>30</sub>)]<sub>2</sub> with PEO<sub>23</sub> DH cross-linking.

**Fig. S13** Optical images of the drug loaded hydrogel before (a) and after (b) drug release; after ground into particles (c) and self-healed into a whole plate (d); and the hydrogel after drug release in pH 5.4 buffer (e).

S1. Synthesis of TPE-2OH.

First, TPE with two phenolic hydroxyl groups (TPE-2OH) was synthesized according to literature.<sup>1</sup> 4-hydroxybenzophenone (2.0 g, 10 mmol) and Zinc dust (2.9 g, 44 mmol) were put into a 250 mL, two-necked, round-bottom flask equipped with a condenser. The oxygen in flask was removed under vacuum and filled with nitrogen for three cycles. After addition of 100 mL anhydrous THF, the mixture was cooled to 0 °C and 2.5 mL TiCl<sub>4</sub> (22 mmol) was slowly injected to the flask. The mixture was warmed gradually to room temperature and then refluxed overnight. The reaction was quenched by 10% K<sub>2</sub>CO<sub>3</sub> solution and the product was extracted with CH<sub>2</sub>Cl<sub>2</sub> three times. The organic phase was washed with saturated NaCl solution 3 times and dried by anhydrous MgSO<sub>4</sub> overnight. After solvent evaporation, the crude product was purified on a silica-gel column using petroleum ether/ethyl acetate (v/v 1:1) as eluent. A yellow solid of TPE-2OH was obtained with about 75% yield (1.38 g). <sup>1</sup>H NMR (400 MHz, DMSO-d<sub>6</sub>): 7.04-7.17 (m, 6H), 6.92-6.97 (m, 4H), 6.70-6.75 (m, 4H), 6.47-6.53 (m, 4H).

## S2. Synthesis of TPE diethanol.

Then TPE-2OH(1.456 g, 4.0 mmol) was reacted with 2-bromoethanol to prepare TPE diethanol as illustrated in Scheme 1.<sup>2</sup> TPE-2OH (1.09g, 3 mmol) and 2-bromoethanol (1.48 g, 12 mmol) were dissolved in 20 mL DMF in a 50 mL flask, then 1.66 g (12 mmol) K<sub>2</sub>CO<sub>3</sub> was added into the flask and the oxygen inside the flask was removed with nitrogen. Then the flask was immersed into a 60 °C oil bath and the reaction was performed for 24 h. After the mixture was cooled to room temperature, saturated NaCl solution was added to dissolve the K<sub>2</sub>CO<sub>3</sub> and the solution was extracted with CH<sub>2</sub>Cl<sub>2</sub> (20 mL×5). The organic phase was combined and washed extensively 5 times with saturated NaCl solution to remove 2-bromoethanol. Then the organic phase was dried by anhydrous MgSO<sub>4</sub> overnight. The excess solvent was removed by rotary evaporator, and the crude product was purified on a silica-gel column using petroleum ether/CH<sub>2</sub>Cl<sub>2</sub> (1/1) (1.08g, ~60% yield). <sup>1</sup>H NMR (600 MHz, CDCl<sub>3</sub>): 7.12-7.05 ppm (m, 4H), 6.93-7.05 ppm (m, 4H), 6.90-6.85 ppm (m, 2H), 6.58-6.53 ppm (m, 2H), 3.92 ppm (t, 2H), 3.54 ppm (t, 2H).

## S3. Synthesis of TPE-2DDMAT.

The TPE-2DDMAT was prepared by condensation of TPE diethanol and DDMAT with DMPA as catalyst and EDC.HCl as dehydrant (Scheme S1).<sup>3</sup> 0.90 g (2.0 mmol) TPE diethanol and 2.18 g DDMAT (12 mmol) were dissolved in 25 mL anhydrous CH<sub>2</sub>Cl<sub>2</sub>. Then 20 mg DMAP was added as catalyst and 1.15 g EDC.HCl was added as dehydrant. The

mixture was stirred for 24 h at room temperature. The product was washed with  $\text{NaHCO}_3$  solution 5 times. After dried by anhydrous  $\text{MgSO}_4$ , the organic phase was concentrated on a rotary evaporator and purified by silica column with petroleum ether/ethyl acetate (7/3) as eluent. TPE-2DDMAT was obtained as range liquid after dried under vacuum (1.48 g ~65% yield).  $^1\text{H NMR}$  (600 MHz,  $\text{CDCl}_3$ ):  $\delta = 7.12\text{-}6.75$  (m, 18H, CH(ph)), 5.30 (t, 4H,  $\text{CH}_2\text{OCO}$ ), 4.72 (t, 4H,  $\text{OCH}_2$ ), 3.29 (t, 4H,  $\text{SCH}_2$ ), 1.80 (s, 12H,  $\text{C}(\text{CH}_3)_2$ ).

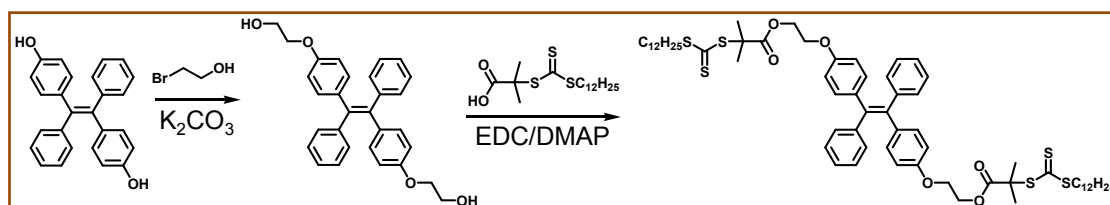

Scheme S1. Synthesis procedure of TPE-2DDMAT.

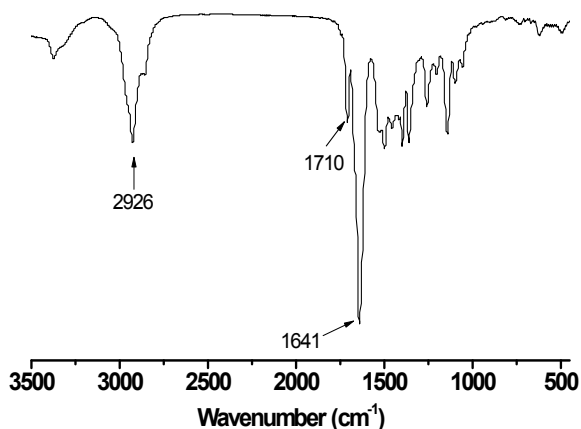

Fig. S1 FT-IR spectrum of TPE-[ $\text{P}(\text{DMA}_{94}\text{-stat-DAA}_{30})_2$ ] (casted on KBr pellet).

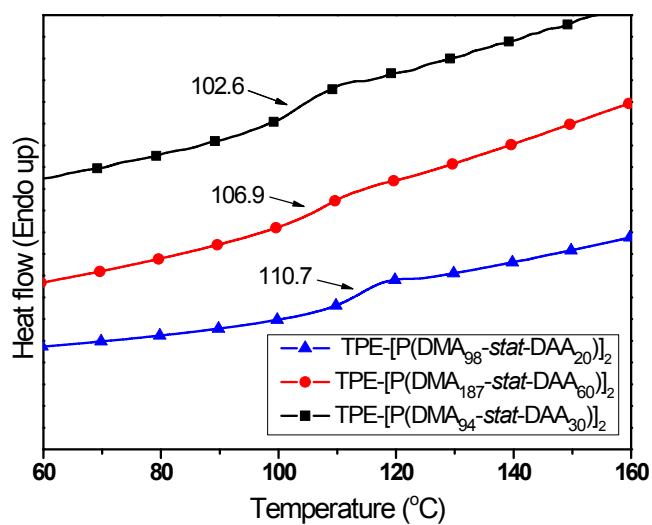

Fig. S2 DSC Curves of the TPE-[P(DMA-*stat*-DAA)]<sub>2</sub>.

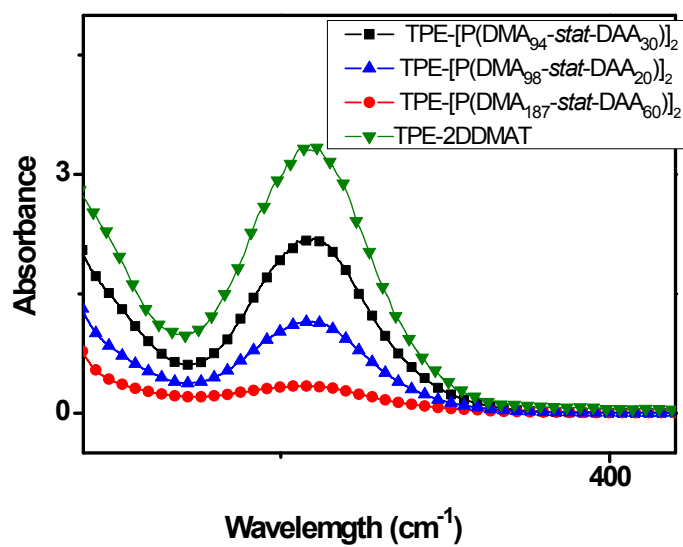

Fig. S3 UV spectra of TPE-2DDMAT solution (in CH<sub>2</sub>Cl<sub>2</sub>) and TPE-[P(DMA-*stat*-DAA)]<sub>2</sub> water solution.

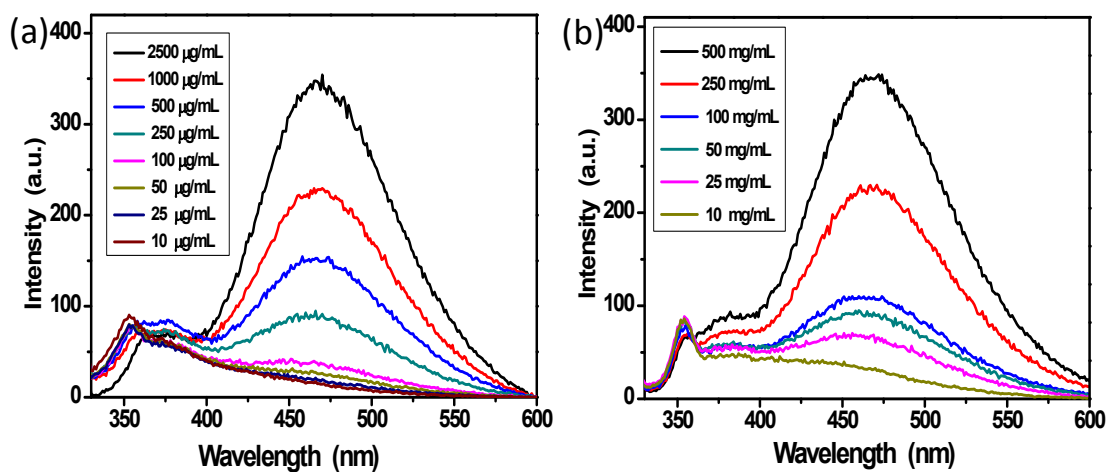

**Fig. S4** Fluorescence spectra of polymer TPE-[P(DMA<sub>187</sub>-*stat*-DAA<sub>60</sub>)]<sub>2</sub> (a) and TPE-[P(DMA<sub>98</sub>-*stat*-DAA<sub>20</sub>)]<sub>2</sub> (b) at various concentration.

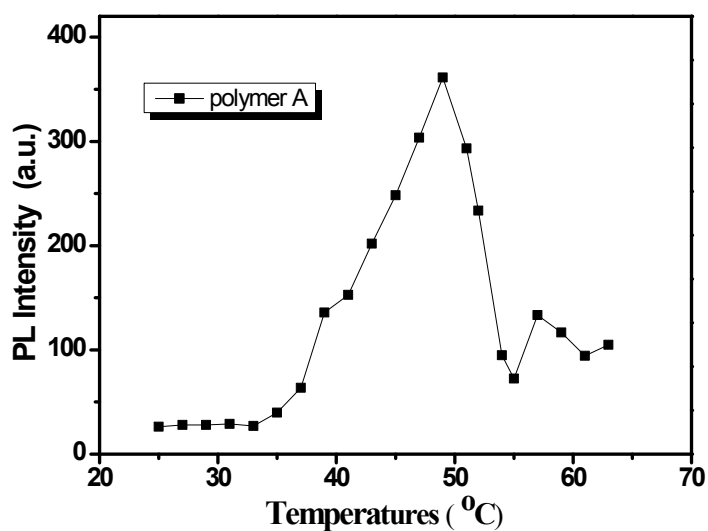

**Fig. S5** PL intensity of 1% TPE-[P(DMA<sub>94</sub>-*stat*-DAA<sub>30</sub>)]<sub>2</sub> solution with increasing temperatures.

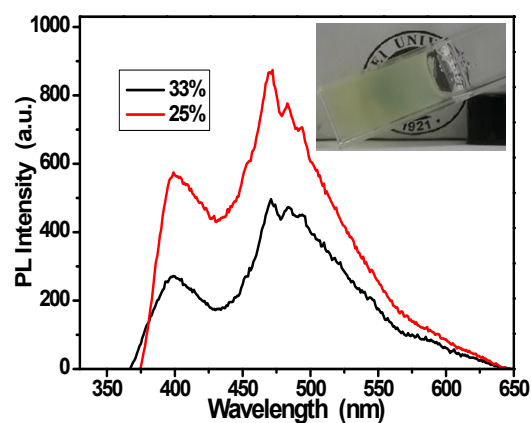

**Fig. S6** Fluorescence spectra of hydrogels prepared from TPE-[P(DMA<sub>94</sub>-stat-DAA<sub>30</sub>)]<sub>2</sub> with low ratio of DTDPH cross-linking (the insert is optical image of 25% ratio of cross-linking).

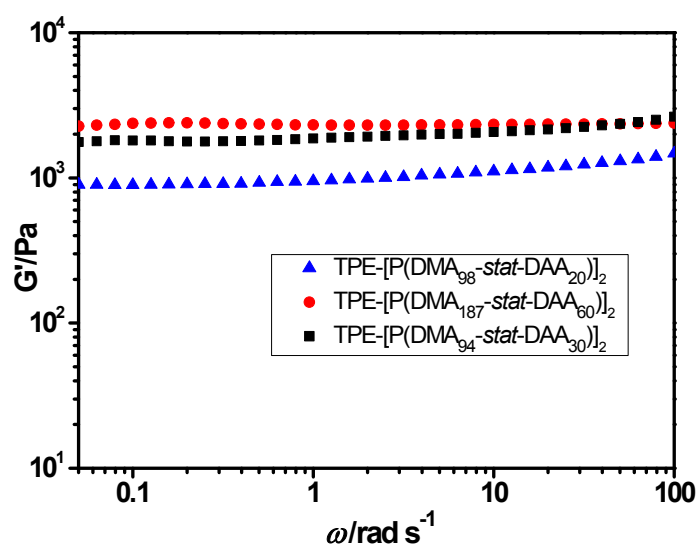

**Fig. S7** Comparison of  $G'$  of the hydrogels prepared from different copolymers with POE<sub>23</sub> DH cross-linking.

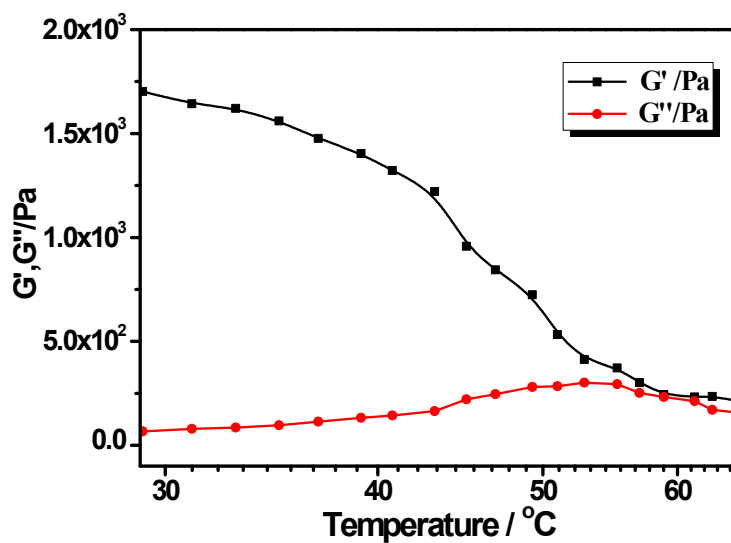

**Fig. S8** Rheology curve of POE<sub>23</sub> DH cross-linked TPE-[P(DMA<sub>94</sub>-*stat*-DAA<sub>30</sub>)]<sub>2</sub> hydrogel under temperature scan.

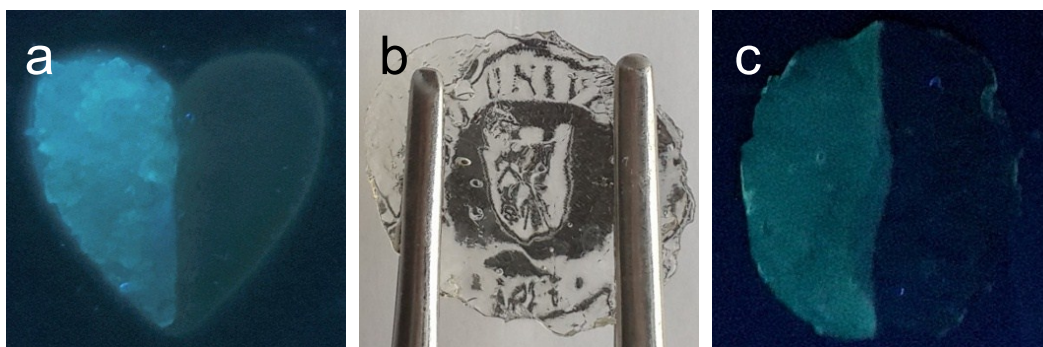

**Fig. S9** TPE-[P(DMA<sub>94</sub>-*stat*-DAA<sub>30</sub>)]<sub>2</sub> hydrogel with PEO<sub>23</sub> DH cross-linking was cut into small particles and put into the heart shaped mould with half hydrogel prepared from P(DMA<sub>93</sub>-*stat*-DAA<sub>30</sub>) (a); self-healed hydrogel disk prepared from TPE-[P(DMA<sub>98</sub>-*stat*-DAA<sub>20</sub>)]<sub>2</sub> with P(DMA<sub>93</sub>-*stat*-DAA<sub>30</sub>) hydrogel under room light (b) and 365 nm UV exposure (c).

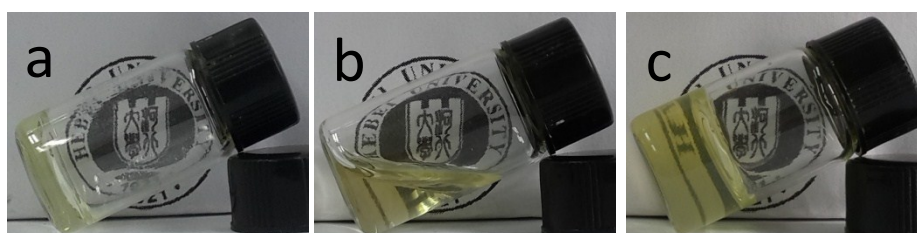

**Fig. S10** Group ratio triggered gel-sol-gel transition of the hydrogel prepared from TPE- TPE-[P(DMA<sub>94</sub>-*stat*-DAA<sub>30</sub>)]<sub>2</sub> with PEO<sub>23</sub> DH cross-linking. (Credit from Hebei University)



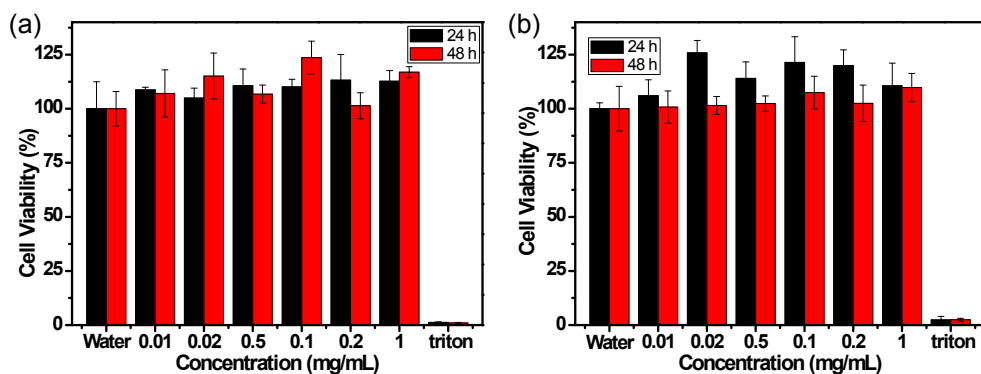

**Fig. S11** In vitro cytotoxicity of TPE-[P(DMA<sub>98</sub>-*stat*-DAA<sub>20</sub>)]<sub>2</sub> and PEO<sub>23</sub> DH solution with various concentration to HeLa cell (a) and JB6 P+ cells (b).

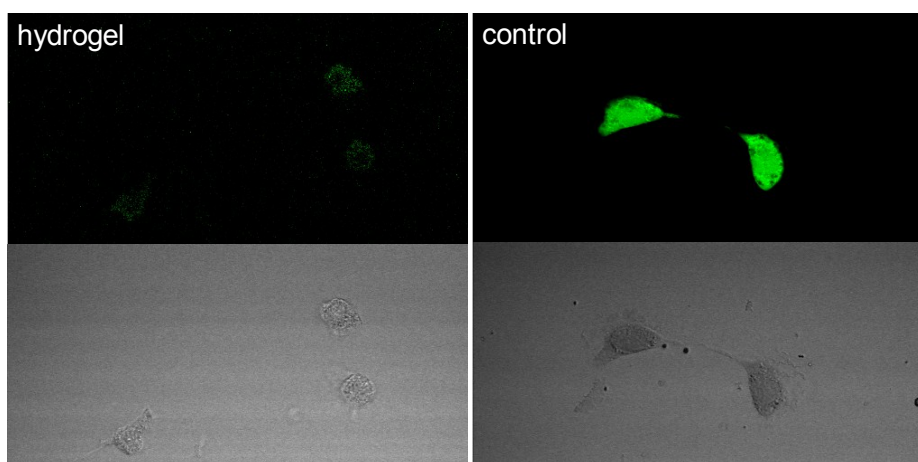

**Fig. S12** Confocal microscopy images of the JB6 P+ cell in hydrogel prepared from TPE-[P(DMA<sub>94</sub>-*stat*-DAA<sub>30</sub>)]<sub>2</sub> with PEO<sub>23</sub> DH cross-linking (magnification:  $\times 60$ . The control is the pure culture-medium).

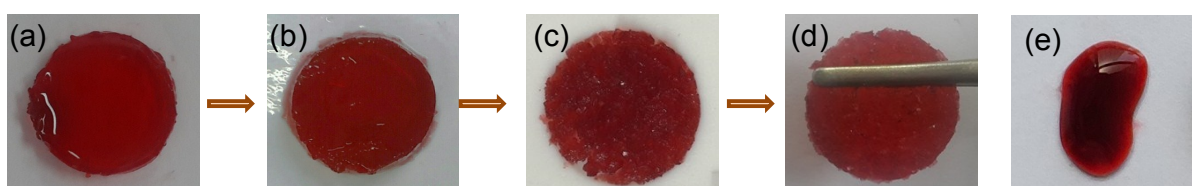

**Fig. S13** Optical images of the drug loaded hydrogel before (a) and after (b) drug release; after ground into particles (c) and self-healed into a whole plate (d); and the hydrogel after drug release in pH 5.4 buffer (e).

References

- (1) Yu, C.; Wu, Y.; Zeng, F.; Li, X.; Shi, J.; Wu, S., Hyperbranched Polyester-Based Fluorescent Probe for Histone Deacetylase via Aggregation-Induced Emission. *Biomacromolecules* **2013**, *14* (12), 4507-4514.
- (2) Zhu, Y.; Wang, F.; Zhang, C.; Du, J., Preparation and Mechanism Insight of Nuclear Envelope-like Polymer Vesicles for Facile Loading of Biomacromolecules and Enhanced Biocatalytic Activity. *ACS Nano* **2014**, *8* (7), 6644-6654.
- (3) Li, H.; Zhang, X.; Zhang, X.; Yang, B.; Yang, Y.; Wei, Y., Ultra-stable biocompatible cross-linked fluorescent polymeric nanoparticles using AIE chain transfer agent. *Polym. Chem.* **2014**, *5* (12), 3758-3762.
